# Supplementary material for: First evidence of convergent lifestyle signal in reptile skull roof microanatomy
Source: PubMed Central journal article supplement (PMC7702674; doi:10.1186/s12915-020-00908-y), 2020-11-30
Supplement: 12915_2020_908_MOESM1_ESM.pdf [file 12915_2020_908_MOESM1_ESM.pdf]

Supplementary Information for

**First Evidence of Convergent Lifestyle Signal  
 in Reptile Skull Roof Microanatomy**

by Roy Ebel\*, Johannes Müller, Till Ramm, Christy Hipsley, and Eli Amson

\*email: royebel@hotmail.de

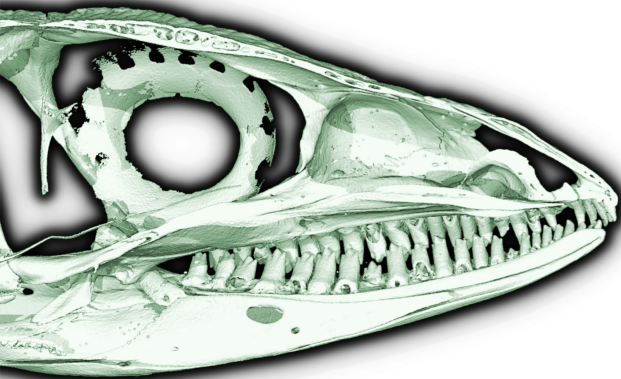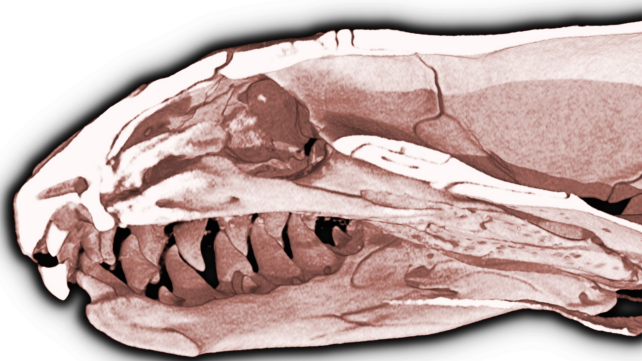

**This PDF file includes:**

**Figure S1.** Principal component analysis of microanatomical and morphological traits..... 2

**Figure S2.** Bivariate morphospaces depicting the convergent evolution of skull roof traits..... 3

**Figure S3.** Deviating proportions of frontal and parietal bones..... 4

**Figure S4.** Logarithmic compactness conversion with indication of conversion equation..... 4

**Figure S5.** Individual compactness and thickness profiles of selected Lepidosauria I..... 5

**Figure S6.** Individual compactness and thickness profiles of selected Lepidosauria II..... 6

**Figure S7.** Individual compactness and thickness profiles of selected Lepidosauria III..... 7

**Table S1.** Result summary..... 8

**Table S2.** Sampled specimens with collection number, scan resolution, and lifestyle..... 9

**Table S3.** Key to collection numbers from Table S2..... 12

**Table S4.** Independent acquisitions of a fully fossorial lifestyle..... 13

**Table S5.** Per specimen measurements..... 14

**Table S6.** Key to species name abbreviations used in Figure 4 and S2..... 17

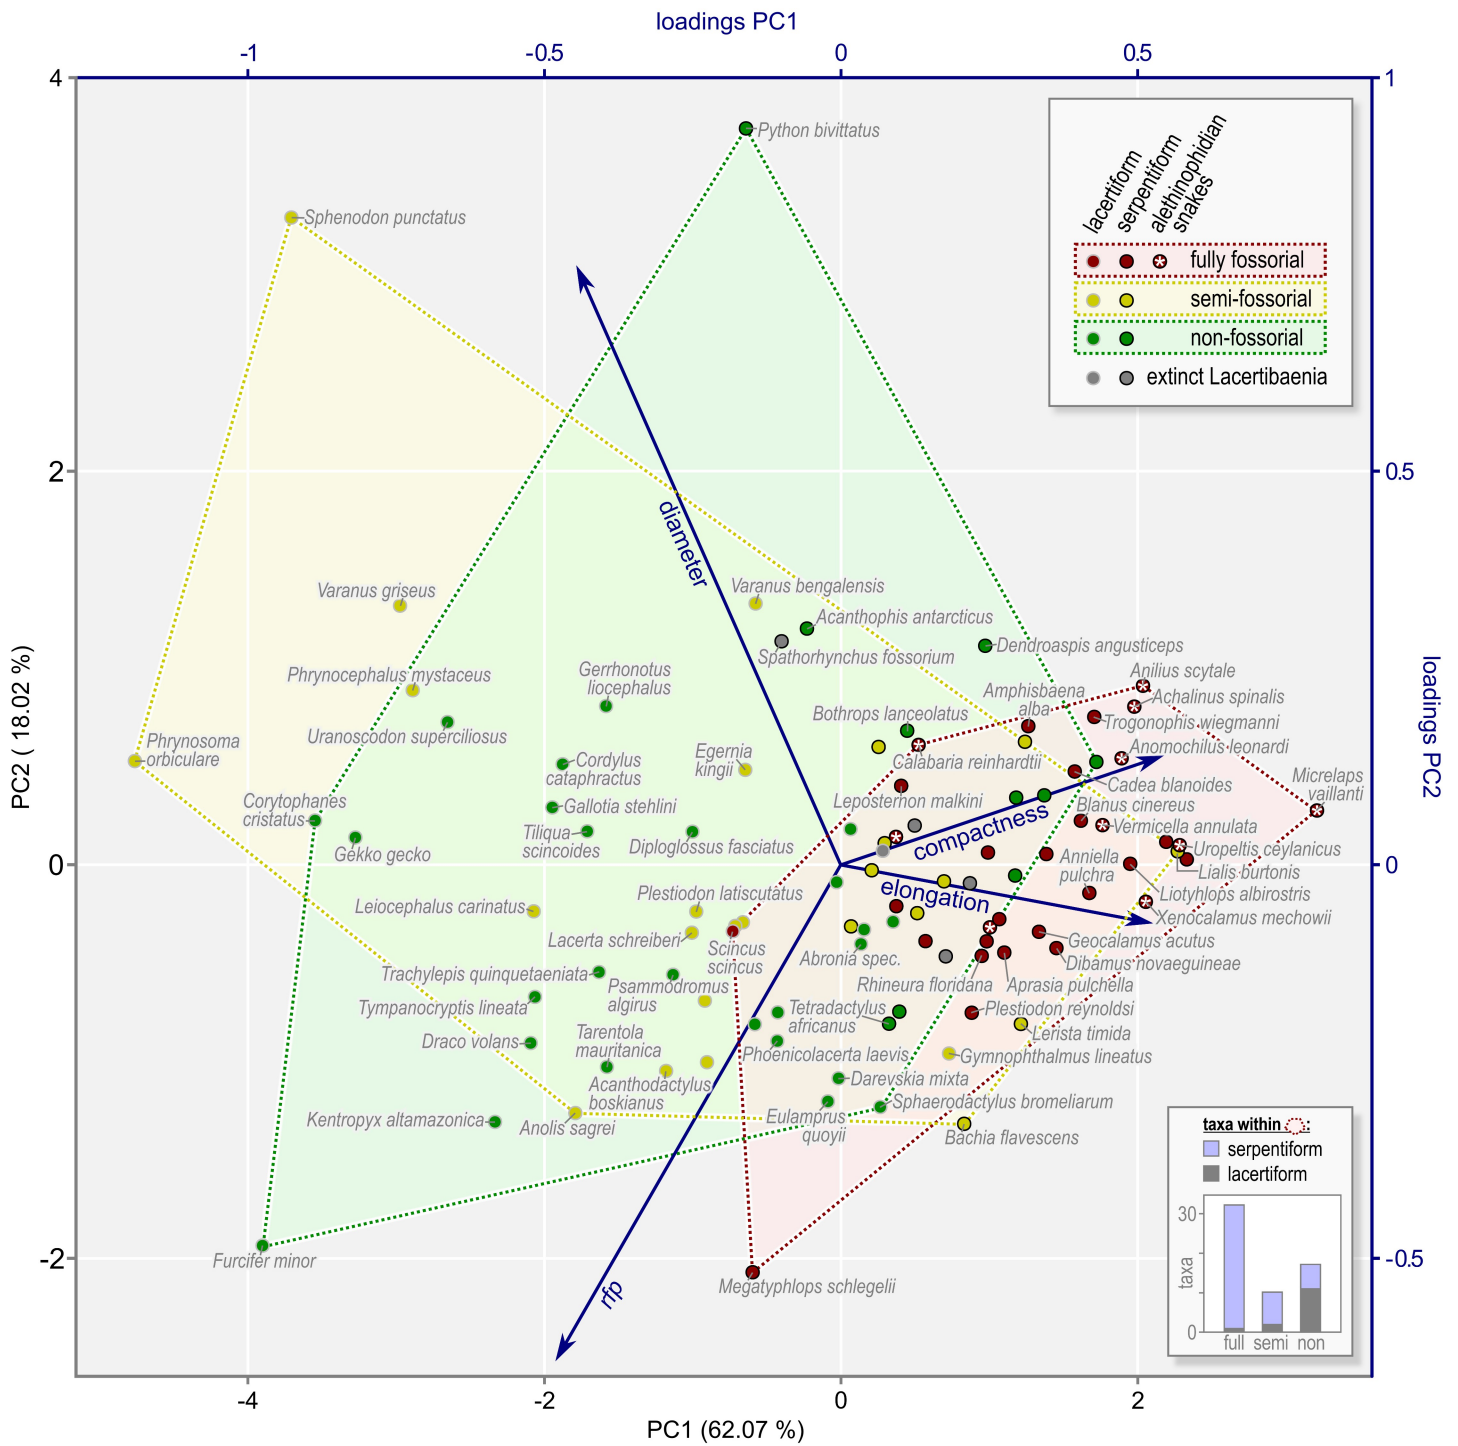

**Figure S1. Principal component analysis of microanatomical and morphological traits** that were found to significantly converge and showed a significant lifestyle signal: compactness, length ratio of frontal and parietal bones *rfp*, cranial elongation, and skull diameter. Bivariate plot (two first PCs) with convex hulls (dotted lines) indicating the morphospace occupied by each lifestyle. Lacertiform/serpentineform bauplan indicated for all taxa – bottom left inset shows proportions of these bauplans for the 59 extant taxa located inside the region overlapping with the fully fossorial morphospace.

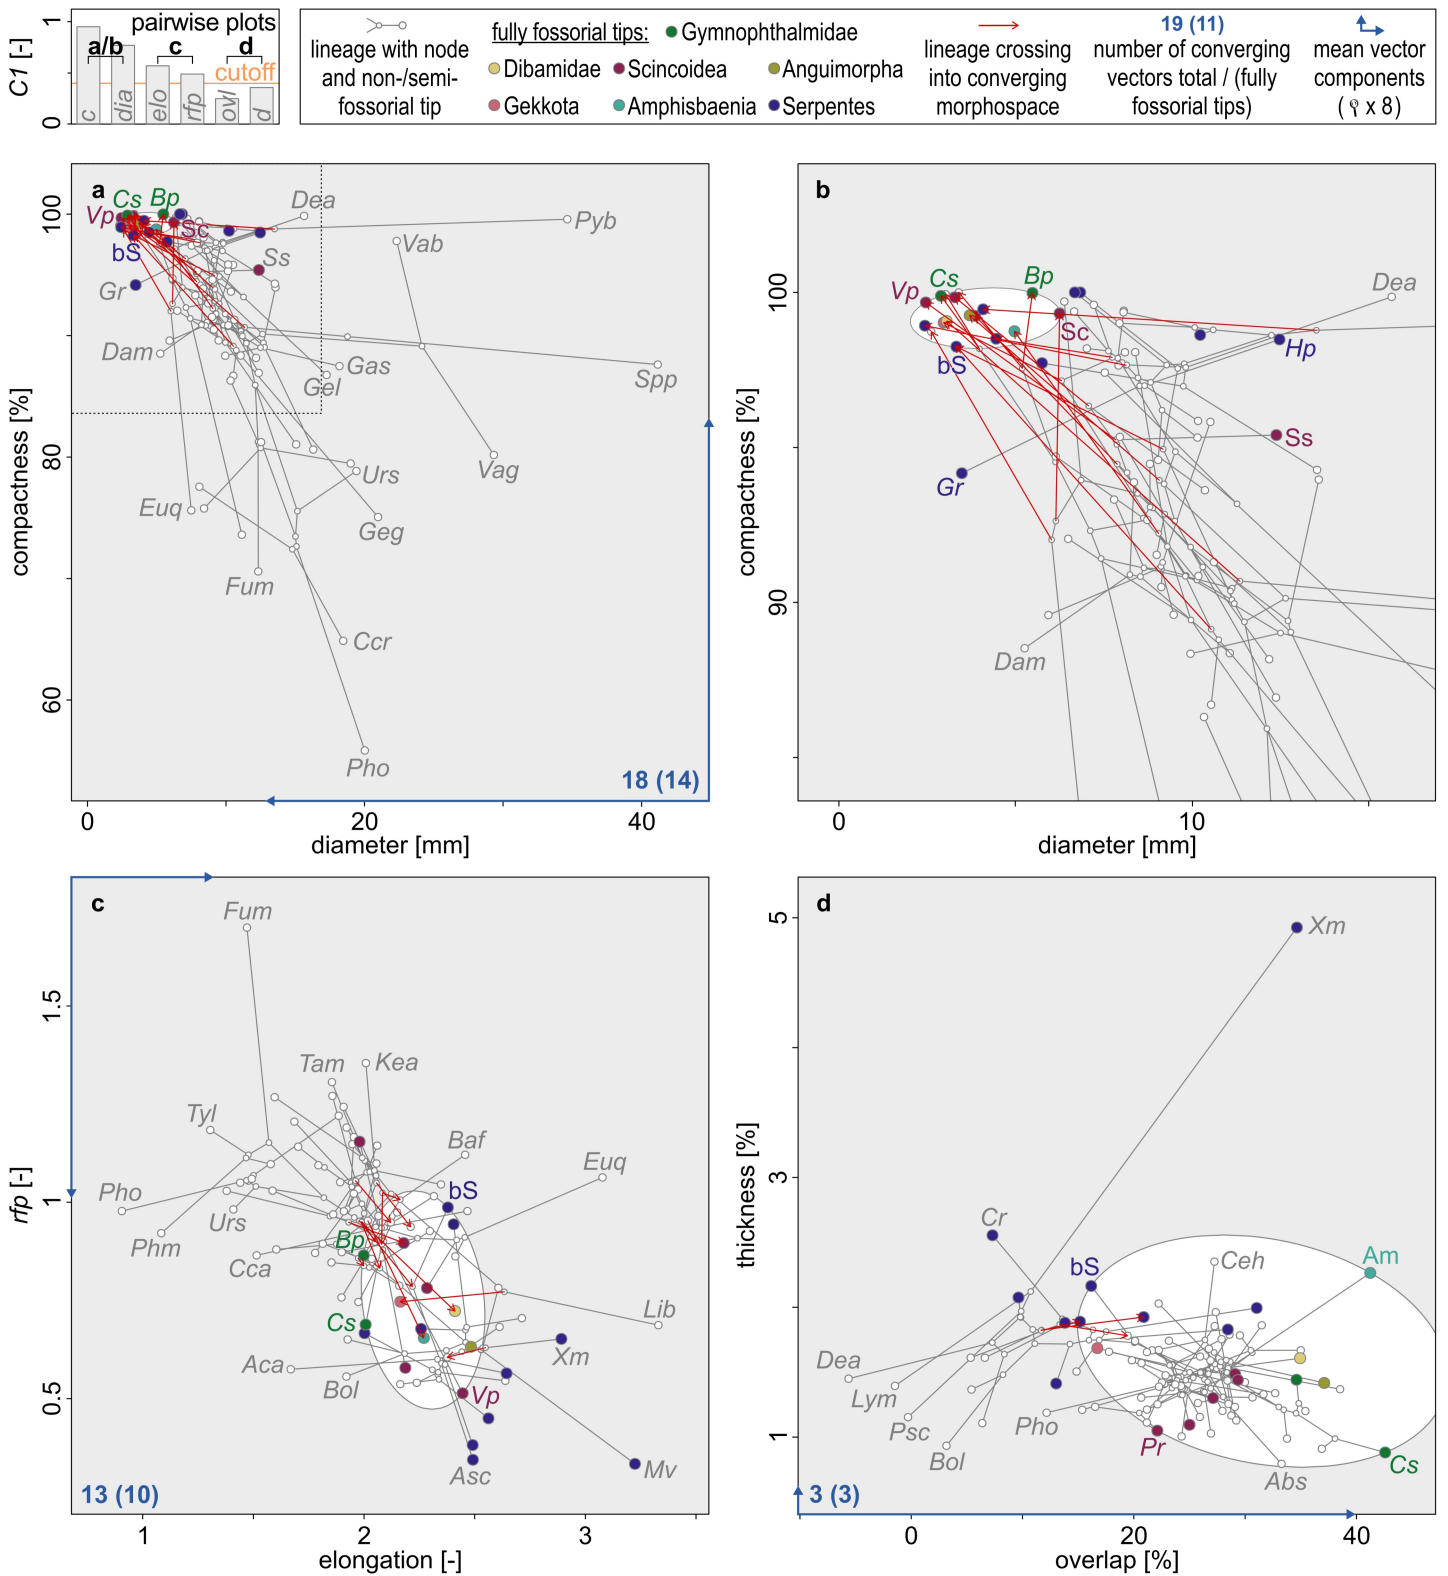

**Figure S2. Bivariate morphospaces depicting the convergent evolution of skull roof traits.** Different from Figure 4, the converging morphospace ellipsoids are defined by the phenotype of limbless taxa that primarily acquired a fully fossorial lifestyle. The convergence index  $C5$  [41] corresponds to the number of lineages entering this space. As indicated by univariate  $C1$  (see top left legend box diagram), compactness and diameter (a, b) are strongly converging – with (b) showing an enlarged excerpt of (a) in accordance with the dashed line. The ratio of frontal and parietal  $rfp$  and elongation (c) are weakly converging, while overlap and thickness (d) are not converging. Note the consistently greater numbers of morphospace vectors converging to fossorial tips compared to the initial lifestyle coding (Figure 4). For key to tip abbreviations, see Table S6.

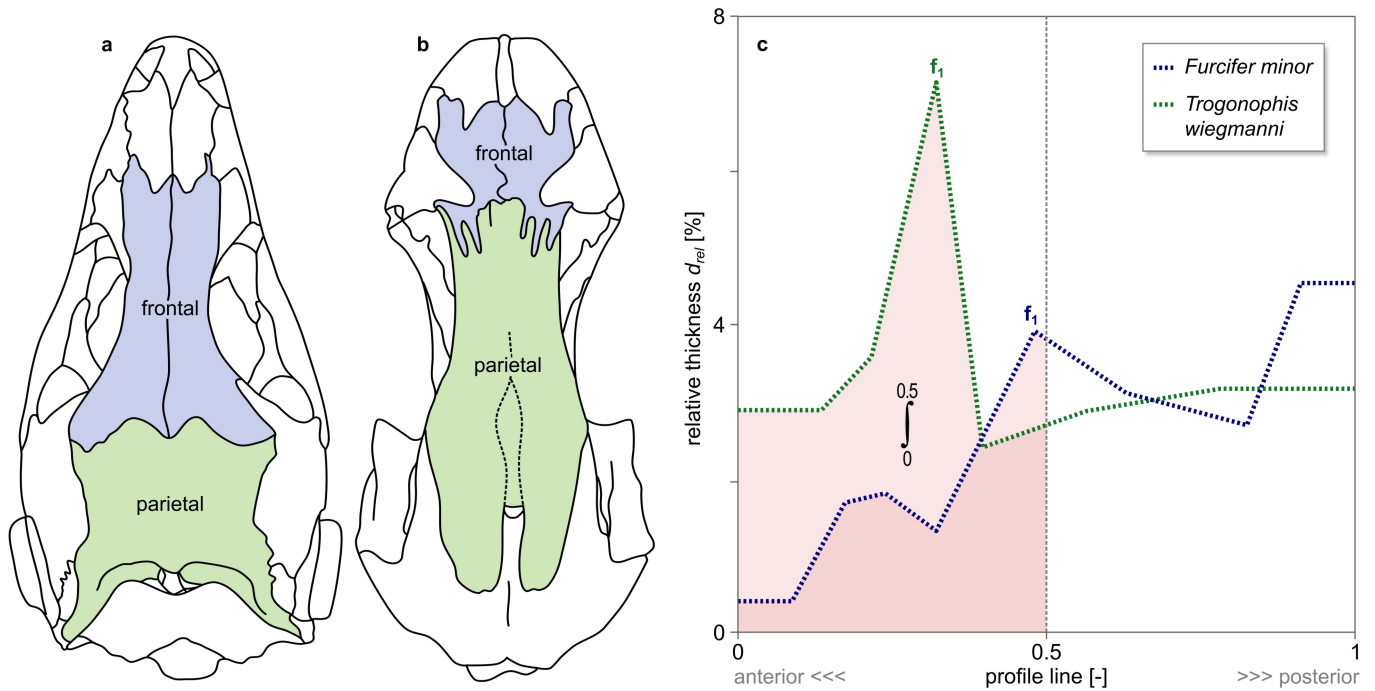

**Figure S3. Frontal and parietal bones may have deviating proportions between squamates of different lifestyles.** Cranium of a non-fossorial lacertid lizard (a) modified from Evans [81] and a fully fossorial amphisbaenian lizard (b) modified from Gans & Montero [39]. Examples of cranial thickness profiles (c) show that measurements for homologous bones may represent very different subsections of the skull roof as a functional unity. We computed thickness profile integrals in the limits from 0 to 0.5 in order to allow for an unbiased interspecific comparison of the anterior skull roof.

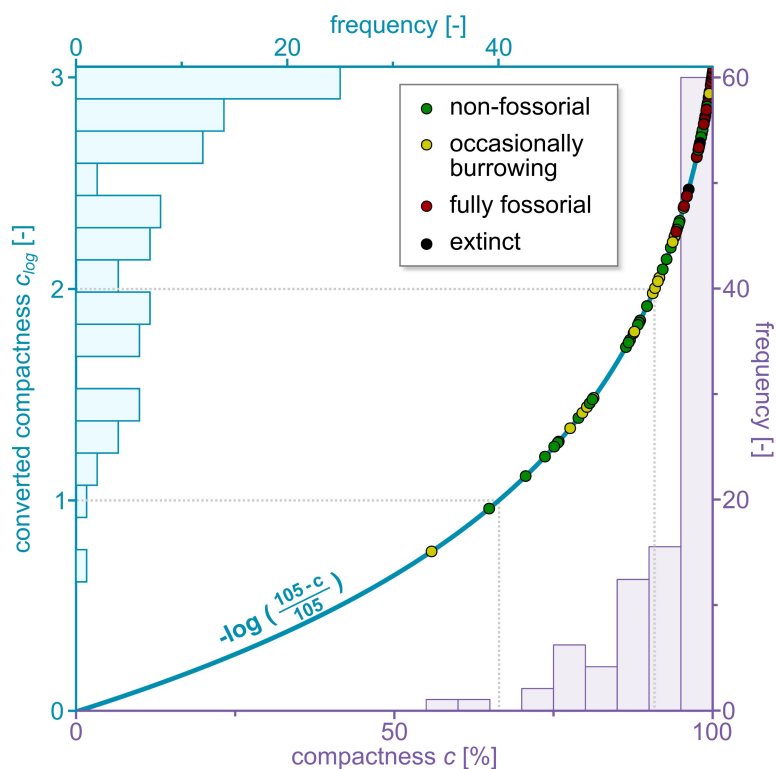

**Figure S4. Logarithmic compactness conversion for individual specimens with indication of conversion equation.** Compactness distribution appears strongly aggregated between 95 % and 100 % (violet histogram). In this interval, conversion produces a more moderate distribution (light blue histogram) to the benefit of an increased resolution. This allows for a more differentiated visualization of trait evolution when mapped on a phylogeny (Figure 5).

INDIVIDUAL PROFILES OF SELECTED LEPIDOSAURIA

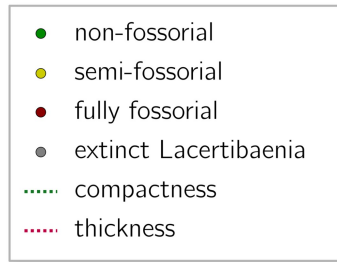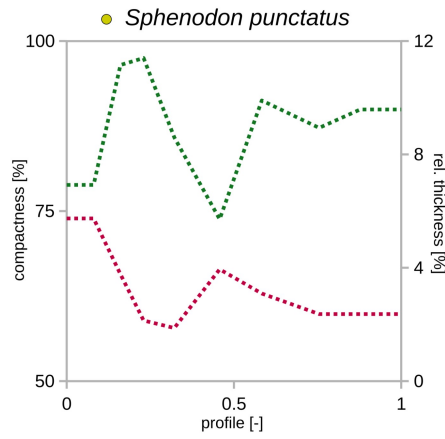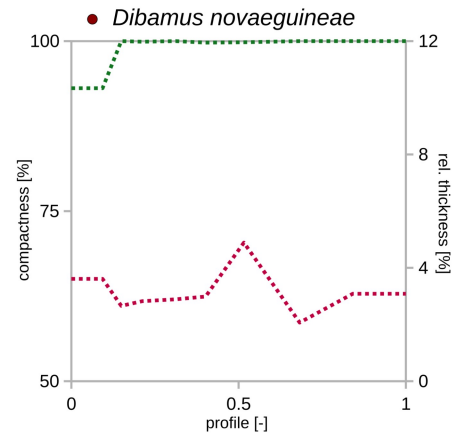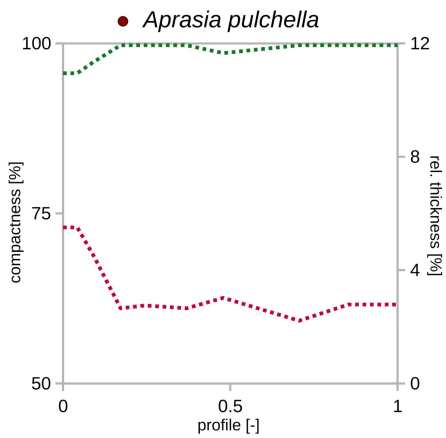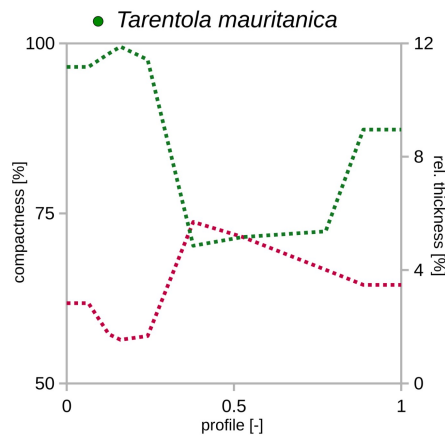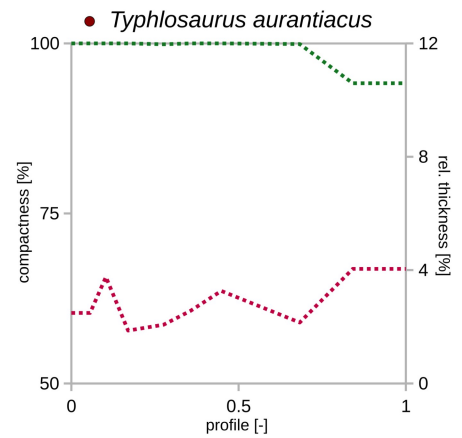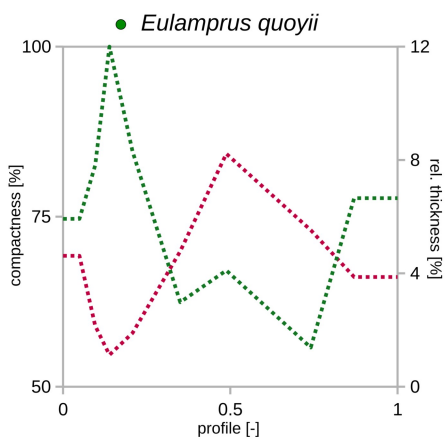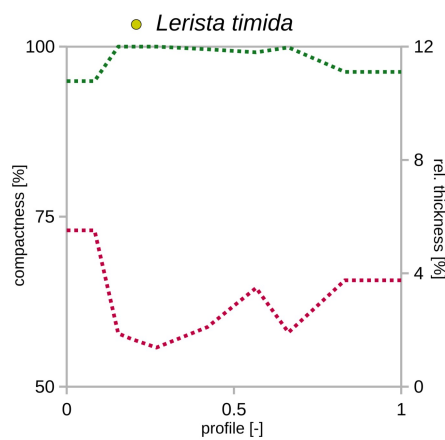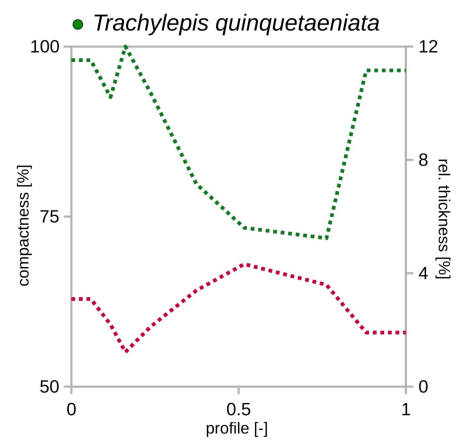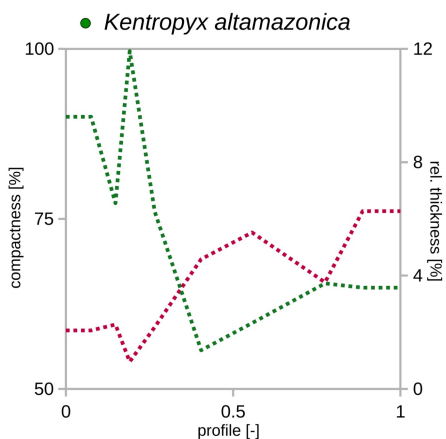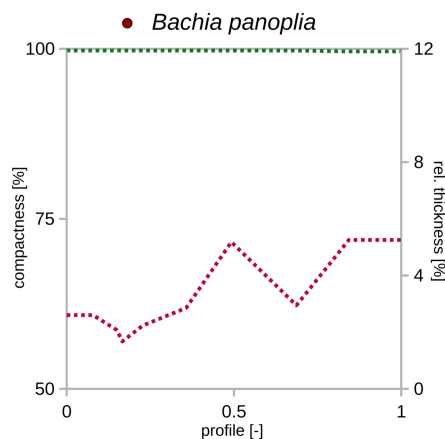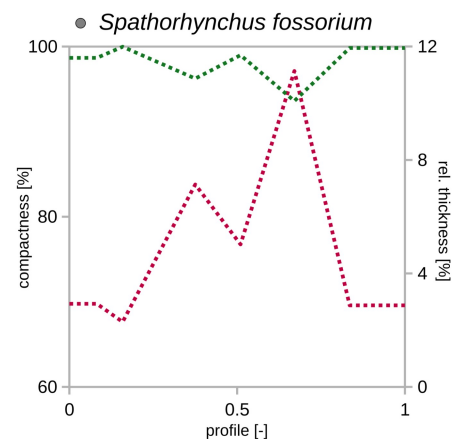

Figure S5. Individual compactness and thickness profiles of selected Lepidosauria I: Sphenodontidae, Dibamidae, Gekkota, Scincoidea, and Lacertoidea 1.

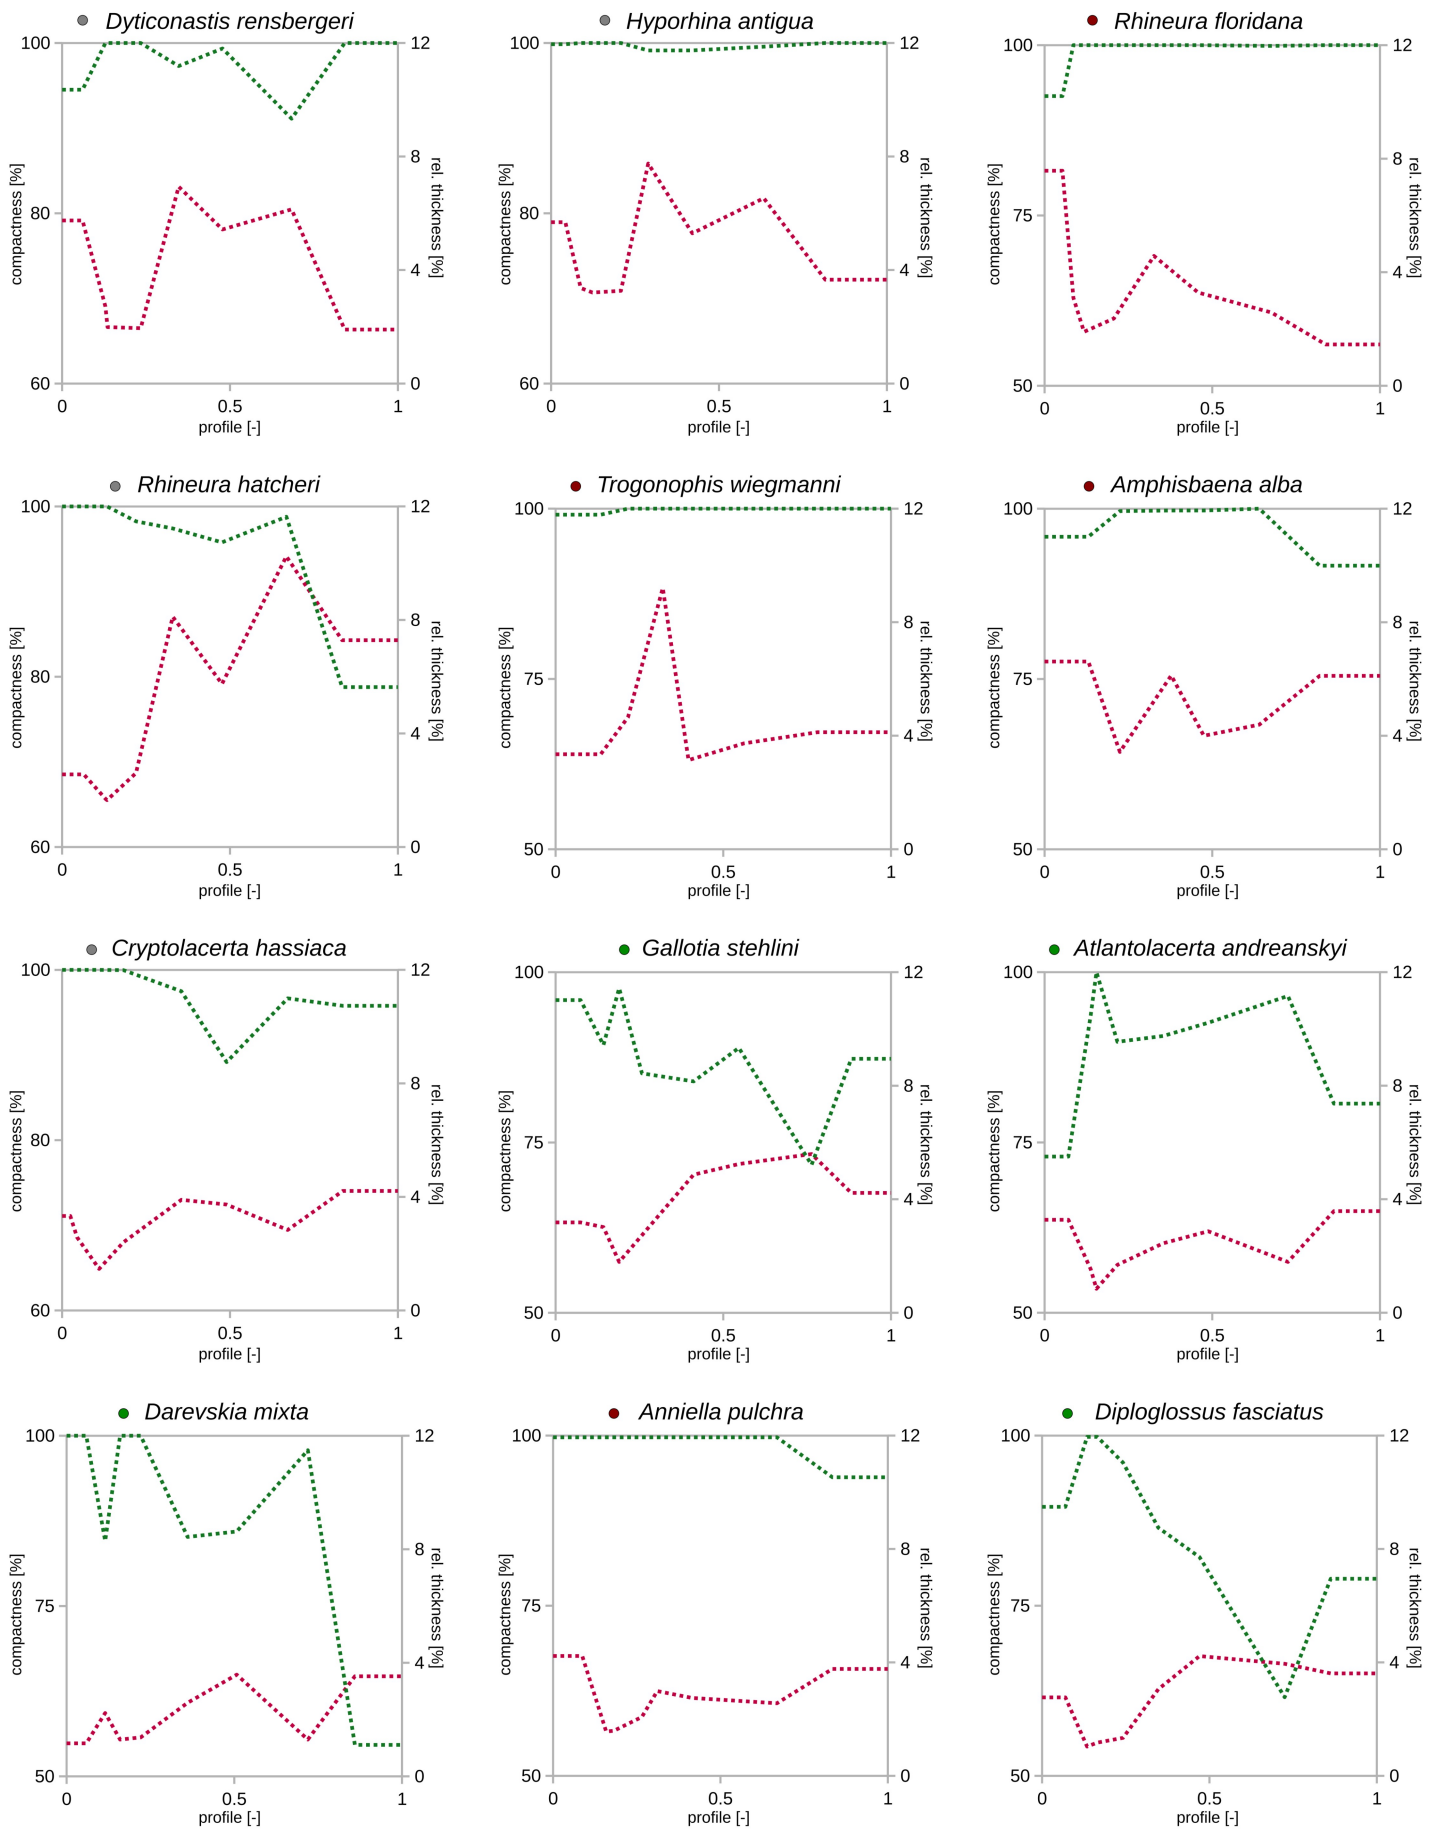

**Figure S6. Individual compactness and thickness profiles of selected Lepidosauria II:** Lacertoidea 2 and Anguimorpha 1. For legend box, see Figure S5.

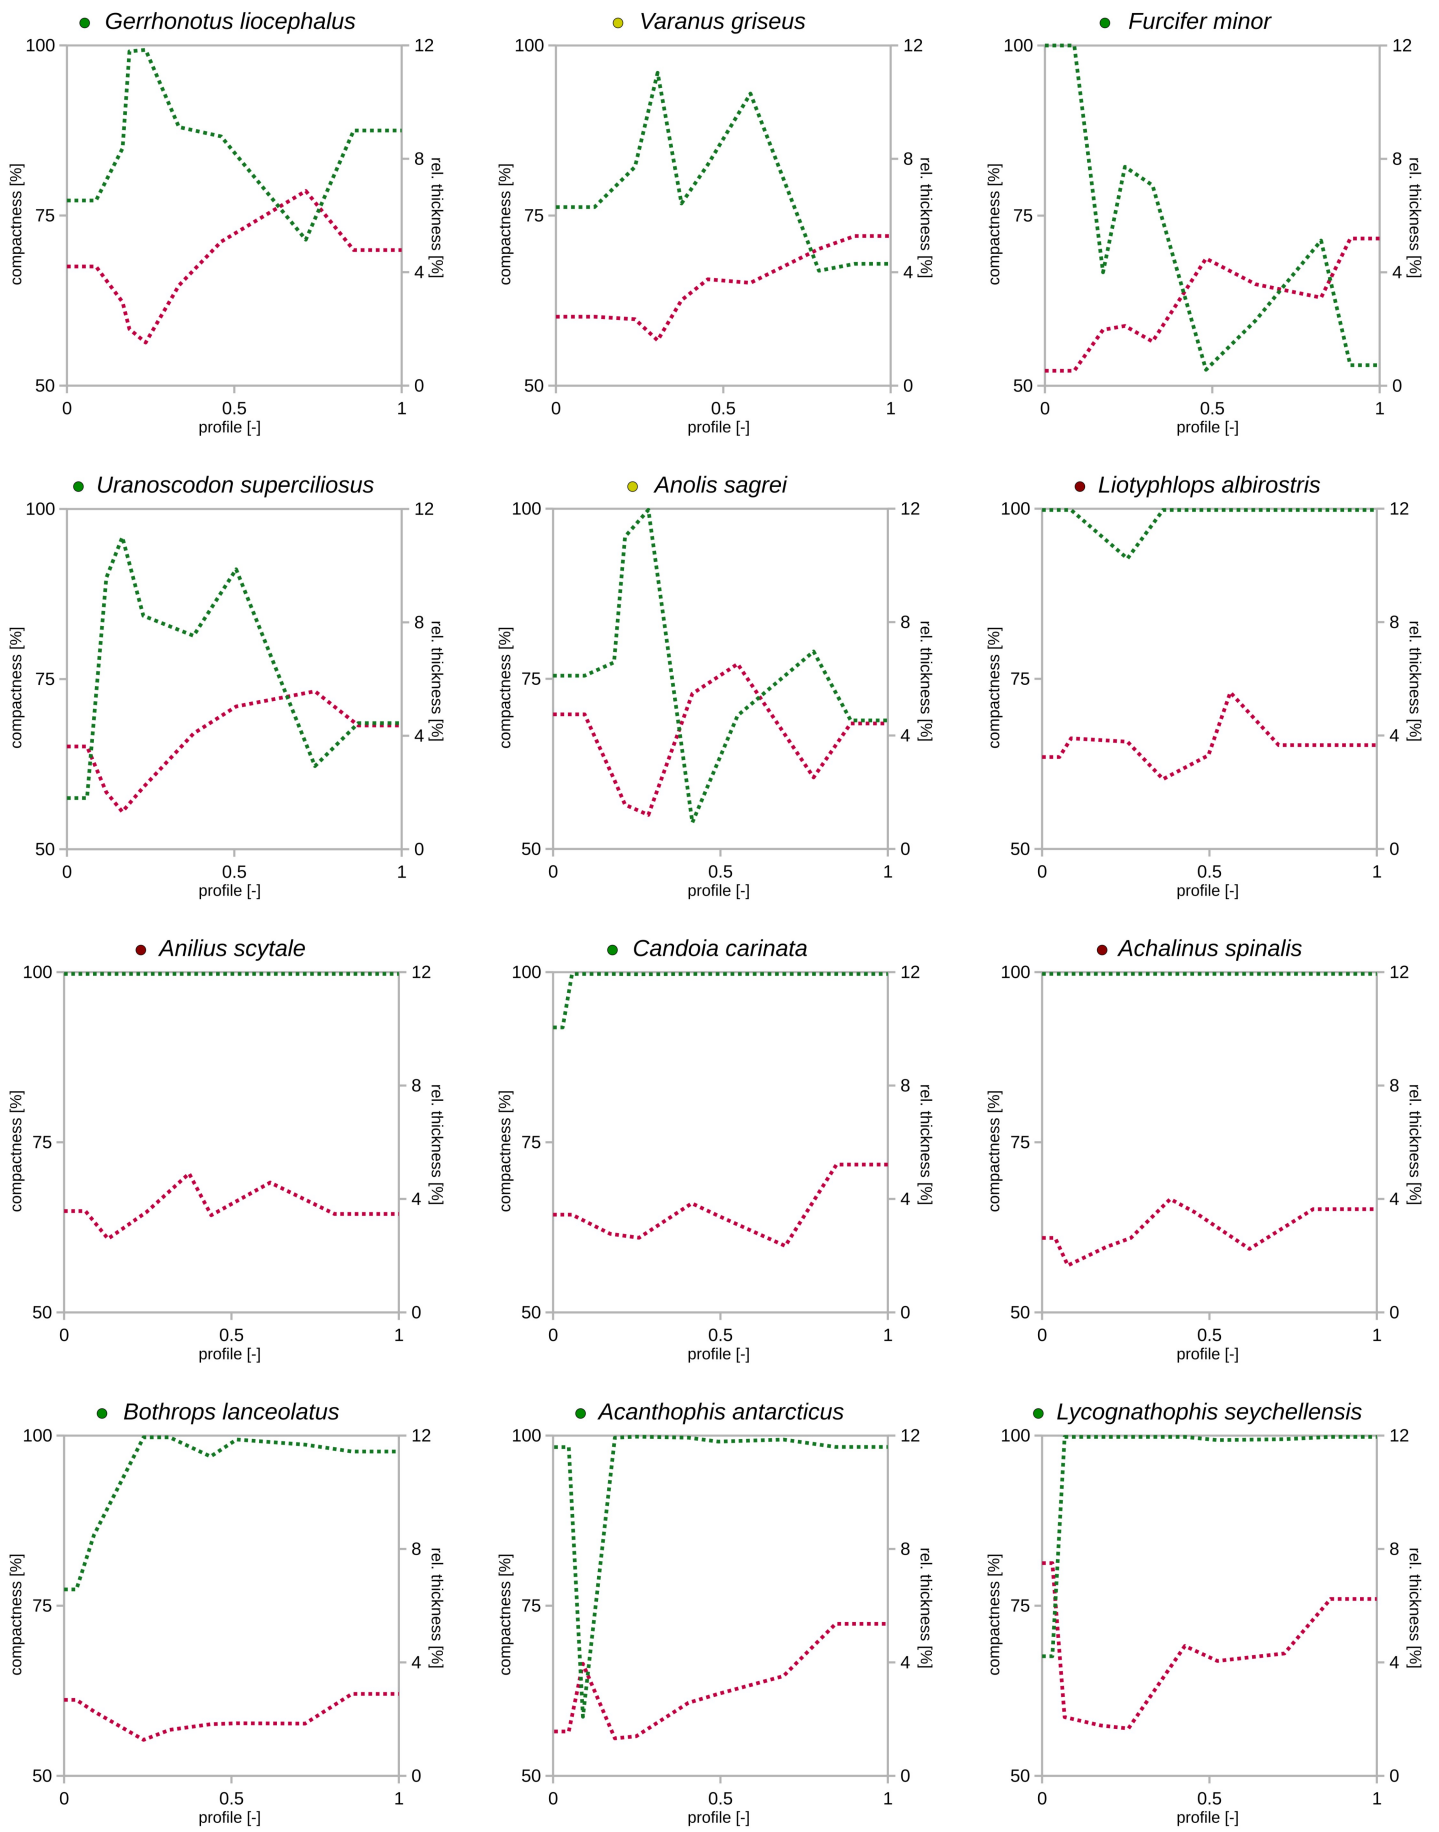

**Figure 7. Individual compactness and thickness profiles of selected Lepidosauria III: Anguimorpha 2, Iguania, and Serpentes.** For legend box, see Figure S5.

**Table S1. Results summary: trait average, phylogenetically informed ANOVAs and PCA, phylogenetic signal and quantification of convergence.** Skull roof compactness (*c*), thickness (*d*), bone overlap (*ovl*), ratio of frontal and parietal (*rfp*), cranial elongation (*elo*), and skull diameter (*dia*) with corresponding *p*-values. Skull dimensions length (*l*), height (*h*), and width (*w*) and posterior thickness profile (*d-posterior*). Lifestyles non-fossorial (*non-foss*), semi-fossorial (*occ-burr*), and fully fossorial (*full-foss*) with Retention Index (*RI*, [42]) and partial least squares analysis (*r-PLS*, [43]).

| dataset & lifestyle                          | $n_{total}$                            | $n_{non-foss}$                   | $n_{occ-burr}$ | $n_{full-foss}$ | $n_{extinct}$ | $RI_{foss}$ | $r-PLS_{foss}$                                       | $p_{r-PLS}$             |        |
|----------------------------------------------|----------------------------------------|----------------------------------|----------------|-----------------|---------------|-------------|------------------------------------------------------|-------------------------|--------|
|                                              | 99                                     | 36                               | 26             | 32              | 5             | 0.42        | 0.37                                                 | 0.005                   |        |
| preliminary phylogenetically informed ANOVAs |                                        |                                  |                | $p_{l-w}$       | $p_{l-h}$     | $p_{w-h}$   | $p_l$                                                | $p_{d-posterior}$       |        |
|                                              |                                        |                                  |                | 0.003           | 0.360         | 0.055       | 0.0004                                               | 0.79                    |        |
| trait average                                | class mean & standard deviation        |                                  | $c$ [%]        | $d$ [%]         | $ovl$ [%]     | $rfp$ [-]   | $elo$ [-]                                            | $dia$ [mm]              |        |
|                                              | non-fossorial                          |                                  | 89.0 ± 9.4     | 1.42 ± 0.29     | 20.9 ± 10.5   | 0.97 ± 0.25 | 1.99 ± 0.42                                          | 11.42 ± 5.93            |        |
|                                              | semi-fossorial                         |                                  | 91.0 ± 9.8     | 1.44 ± 0.33     | 25.1 ± 7.7    | 0.96 ± 0.19 | 1.94 ± 0.46                                          | 11.90 ± 8.47            |        |
|                                              | fully fossorial                        |                                  | 98.8 ± 1.4     | 1.95 ± 0.73     | 29.6 ± 11.9   | 0.68 ± 0.27 | 2.35 ± 0.32                                          | 5.13 ± 2.78             |        |
|                                              | extinct Lacertibaenia                  |                                  | 97.8 ± 1.3     | 2.15 ± 0.39     | 36.5 ± 10.4   | 0.81 ± 0.06 | 2.12 ± 0.18                                          | 9.72 ± 5.01             |        |
| phylogenetically informed ANOVAs             | comparison between lifestyle classes   |                                  | $p_c$          | $p_d$           | $p_{ovl}$     | $p_{rfp}$   | $p_{elo}$                                            | $p_{dia}$               |        |
|                                              | overall comparison                     |                                  | 0.0010         | 0.0004          | 0.0004        | 0.0003      | 0.0207                                               | 0.0008                  |        |
|                                              | pairwise                               | non-fossorial ~ semi-fossorial   |                | 0.1175          | 0.8318        | 0.2504      | 0.8529                                               | 0.8070                  | 0.4855 |
|                                              |                                        | non-fossorial ~ fully fossorial  |                | 0.0009          | 0.0003        | 0.0003      | 0.0006                                               | 0.0384                  | 0.0012 |
|                                              |                                        | semi-fossorial ~ fully fossorial |                | 0.1168          | 0.0014        | 0.0010      | 0.0014                                               | 0.0384                  | 0.0012 |
|                                              | log size correlation                   |                                  | $p_c$          | $p_d$           | $p_{ovl}$     | $p_{rfp}$   | $p_{elo}$                                            |                         |        |
|                                              | overall dataset                        |                                  | 0.0020         | 1.0000          | 0.0036        | 0.0119      | 0.0020                                               |                         |        |
| subsets                                      | non-fossorial                          |                                  | 0.2328         | 0.3300          | 1.0000        | 1.0000      | 0.0728                                               |                         |        |
|                                              | semi-fossorial                         |                                  | 0.0420         | 0.3380          | 0.4014        | 1.0000      | 0.0208                                               |                         |        |
|                                              | fully fossorial                        |                                  | 1.0000         | 1.0000          | 1.0000        | 0.0897      | 0.4000                                               |                         |        |
|                                              |                                        |                                  |                |                 |               |             |                                                      |                         |        |
| phylo signal                                 | phylogenetic signal in trait evolution |                                  | $c$            | $d$             | $ovl$         | $rfp$       | $elo$                                                | $dia$                   |        |
|                                              | Pagel's $\lambda$                      |                                  | 0.88           | 0.38            | 0.78          | 1.00        | 0.66                                                 | 0.84                    |        |
|                                              | $p_\lambda$                            |                                  | ≪ 0.0001       | 0.015           | ≪ 0.0001      | ≪ 0.0001    | < 0.0001                                             | < 0.0001                |        |
| convevol package                             | quantification of convergence          |                                  | $c$            | $d$             | $ovl$         | $rfp$       | $elo$                                                | $dia$                   |        |
|                                              | $C1$                                   |                                  | 0.81           | 0.28            | 0.36          | 0.44        | 0.49                                                 | 0.56                    |        |
|                                              | cutoff                                 |                                  | 0.37           | 0.37            | 0.37          | 0.37        | 0.37                                                 | 0.37                    |        |
|                                              | $p_{C1}$                               |                                  | < 0.0001       | 0.6525          | 0.0556        | 0.0018      | 0.0001                                               | < 0.0001                |        |
|                                              | $C5$                                   |                                  | 25             | 0               | 2             | 0           | 18                                                   | 17                      |        |
|                                              | $p_{C5}$                               |                                  | < 0.0001       | 1.0000          | 0.1583        | 1.0000      | < 0.0001                                             | < 0.0001                |        |
| principal components                         | principal component analysis           |                                  | $PC1$          | $PC2$           | $PC3$         | $PC4$       | lifestyle signal in $PC1$<br>(phylo. informed ANOVA) |                         |        |
|                                              | variance explained [%]                 |                                  | 62.07          | 18.02           | 10.82         | 9.10        |                                                      |                         |        |
|                                              | loadings                               | $c$                              |                | 0.544           | 0.139         | 0.191       | 0.805                                                | overall $p = 0.0001$    |        |
|                                              |                                        | $rfp$                            |                | -0.479          | -0.630        | -0.335      | 0.512                                                | non~ semi $p = 0.6612$  |        |
|                                              |                                        | $elo$                            |                | 0.526           | -0.074        | -0.835      | -0.144                                               | non~ full $p = 0.0003$  |        |
|                                              |                                        | $dia$                            |                | -0.445          | 0.761         | -0.393      | -0.262                                               | semi~ full $p = 0.0006$ |        |



**Table S2. Sampled specimens with collection number,  $\mu$ CT scan resolution ( $[\mu\text{m}]$  = voxel size), and lifestyle (LS, 1 = non-fossorial, 2 = semi-fossorial, 3 = fully fossorial) in accordance with given reference. Where not otherwise noted,  $\mu$ CT scans were carried out at the CT- & Visualization Lab, Museum für Naturkunde, Leibniz Institute for Evolution and Biodiversity Science, Berlin, Germany with GE Phoenix Nanotom S (RRID:SCR\_017995) or Xylon FF35 CT (RRID:SCR\_018208).**

| <i>SPECIES</i>                     | SPECIMEN      | CLADE             | HIGHER LEVEL | $[\mu\text{m}]$ | LS | REFERENCE                        |
|------------------------------------|---------------|-------------------|--------------|-----------------|----|----------------------------------|
| <i>Sphenodon punctatus</i>         | ZMB 13837     | Sphenodontidae    | Lepidosauria | 46.3            | 2  | Dawbin [82]                      |
| <i>Dibamus novaeguineae</i>        | ZMB 8856      | Dibamidae         | Squamata     | 5.8             | 3  | Rieppel [83]                     |
| <i>Lialis burtonis</i>             | ZMB 10546     | Pygopodidae       | Gekkota      | 14.3            | 2  | Shea [84]                        |
| <i>Aprasia pulchella</i>           | ZMB 25504     | Pygopodidae       | Gekkota      | 5.7             | 3  | Shea [84]                        |
| <i>Sphaerodactylus bromeliarum</i> | ZMB 42827     | Sphaerodactylidae | Gekkota      | 3.5             | 1  | Peters & Schwartz [70]           |
| <i>Tarentola mauritanica</i>       | ZMB 17966     | Phyllodactylidae  | Gekkota      | 11.3            | 1  | Johnson, Russell, & Bauer [85]   |
| <i>Gekko gecko</i>                 | ZMB 48746     | Gekkonidae        | Gekkota      | 20.0            | 1  | Subramanean & Vikram Reddy [86]  |
| <i>Xantusia riversiana</i>         | ZMB 29899     | Xantusiidae       | Scincoidea   | 9.3             | 1  | Fellers & Drost [87]             |
| <i>Tetradactylus africanus</i>     | AMNH 57628    | Gerrhosauridae    | Scincoidea   | 8.0             | 1  | Mason & Alexander [88]           |
| <i>Platysaurus capensis</i>        | ZMB 38563     | Cordylidae        | Scincoidea   | 11.4            | 1  | Whiting et al. [89]              |
| <i>Cordylus cataphractus</i>       | ZMB 74455     | Cordylidae        | Scincoidea   | 14.6            | 1  | Broeckhoven & Mouton [90]        |
| <i>Chamaesaura anguina</i>         | ZMB 56421     | Cordylidae        | Scincoidea   | 7.5             | 1  | Shine & Wall [91]                |
| <i>Typhlosaurus aurantiacus</i>    | ZMB 3936      | Scincidae         | Scincoidea   | 4.9             | 3  | Vitt & Caldwell [23]             |
| <i>Plestiodon latiscutatus</i>     | ZMB 26508     | Scincidae         | Scincoidea   | 10.0            | 2  | Goris [92]                       |
| <i>Plestiodon reynoldsi</i>        | ZMB 23322     | Scincidae         | Scincoidea   | 7.1             | 3  | Pike, Peterman, & Exum [93]      |
| <i>Scincus scincus</i>             | ZMB 15318     | Scincidae         | Scincoidea   | 13.8            | 3  | Stadler et al. [94]              |
| <i>Grandidierina petiti</i>        | ZSM 1620/2010 | Scincidae         | Scincoidea   | 8.3             | 3  | Rosa et al. [95]                 |
| <i>Sphenomorphus solomonis</i>     | ZMB 8803      | Scincidae         | Scincoidea   | 9.3             | 1  | Shine & Wall [91]                |
| <i>Saiphos equalis</i>             | SAMA R39075   | Scincidae         | Scincoidea   | 11.1            | 3  | Shine & Wall [91]                |
| <i>Coeranoscincus reticulatus</i>  | SAMA R27452   | Scincidae         | Scincoidea   | 20.0            | 3  | Rabosky et al. [96]              |
| <i>Eulamprus quoyii</i>            | ZMB 43336     | Scincidae         | Scincoidea   | 11.8            | 1  | Law & Bradley [97]               |
| <i>Lerista timida</i>              | SAMA R57365   | Scincidae         | Scincoidea   | 7.2             | 2  | Robertson & Coventry [98]        |
| <i>Egernia kingii</i>              | ZMB 21457     | Scincidae         | Scincoidea   | 14.3            | 2  | Chapple [99]                     |
| <i>Tiliqua scincoides</i>          | ZMB 17061     | Scincidae         | Scincoidea   | 16.5            | 1  | Price-Rees, Brown, & Shine [100] |
| <i>Liopholis whitii</i>            | ZMB 29584     | Scincidae         | Scincoidea   | 11.3            | 2  | Chapple [99]                     |

|                                     |                          |                                 |             |                   |     |                                                  |
|-------------------------------------|--------------------------|---------------------------------|-------------|-------------------|-----|--------------------------------------------------|
| <i>Eutropis multifasciata</i>       | ZMB 77386                | Scincidae                       | Scincoidea  | 10.7              | 2   | Catena & Hembree [101]                           |
| <i>Trachylepis quinquetaeniata</i>  | ZMB 31019                | Scincidae                       | Scincoidea  | 15.0              | 1   | Spawls et al. [102]                              |
| <i>Kentropyx altamazonica</i>       | ZMB 69836                | Teiidae                         | Lacertoidea | 12.5              | 1   | Vitt et al. [103]                                |
| <i>Alopoglossus copii</i>           | ZMB 9986                 | Gymnophthalmidae                | Lacertoidea | 10.0              | 2   | Hernández-Jaimes, Jerez, & Ramírez-Pinilla [104] |
| <i>Bachia flavescens</i>            | ZMB 8585                 | Gymnophthalmidae                | Lacertoidea | 10.0              | 2   | Barros, Herrel, & Kohlsdorf [27]                 |
| <i>Bachia panoplia</i>              | AMNH R64876              | Gymnophthalmidae                | Lacertoidea | 8.3               | 3   | Barros, Herrel, & Kohlsdorf [27]                 |
| <i>Calyptommatus sinebrachiatus</i> | AMNH R138889             | Gymnophthalmidae                | Lacertoidea | 3.3               | 3   | Barros, Herrel, & Kohlsdorf [27]                 |
| <i>Gymnophthalmus lineatus</i>      | ZMB 28660                | Gymnophthalmidae                | Lacertoidea | 4.9               | 2   | van Buurt [105]                                  |
| <i>Spathorhynchus fossorium</i>     | USNM 26318               | Amphisbaenia:<br>Rhineuridae    | Lacertoidea | 21.5 <sup>1</sup> | n/a | [extinct]                                        |
| <i>Dyticonastis rensbergeri</i>     | UCMP 76881 <sup>2</sup>  | Amphisbaenia:<br>Rhineuridae    | Lacertoidea | 13.0              | n/a | [extinct]                                        |
| <i>Hyporhina antiqua</i>            | ZMPU 11390               | Amphisbaenia:<br>Rhineuridae    | Lacertoidea | 5.0               | n/a | [extinct]                                        |
| <i>Rhineura floridana</i>           | ZMB 13848                | Amphisbaenia:<br>Rhineuridae    | Lacertoidea | 8.3               | 3   | Vitt & Caldwell [23]                             |
| <i>Rhineura hatcheri</i>            | CM 15763                 | Amphisbaenia:<br>Rhineuridae    | Lacertoidea | 7.5               | n/a | [extinct]                                        |
| <i>Bipes tridactylus</i>            | FMNH 265140<br>CG5528    | Amphisbaenia:<br>Bipedidae      | Lacertoidea | 6.0               | 3   | Vitt & Caldwell [23]                             |
| <i>Blanus cinereus</i>              | ZMB 1389                 | Amphisbaenia:<br>Blanidae       | Lacertoidea | 6.7               | 3   | Vitt & Caldwell [23]                             |
| <i>Trogonophis wiegmanni</i>        | ZMB 55026                | Amphisbaenia:<br>Trogonophidae  | Lacertoidea | 12.2              | 3   | Vitt & Caldwell [23]                             |
| <i>Cadea blanooides</i>             | ZMB 4082                 | Amphisbaenia:<br>Cadeidae       | Lacertoidea | 11.0              | 3   | Vitt & Caldwell [23]                             |
| <i>Geocalamus acutus</i>            | ZMB 21941                | Amphisbaenia:<br>Amphisbaenidae | Lacertoidea | 7.0               | 3   | Vitt & Caldwell [23]                             |
| <i>Amphisbaena alba</i>             | ZMB 77355                | Amphisbaenia:<br>Amphisbaenidae | Lacertoidea | 17.7              | 3   | Vitt & Caldwell [23]                             |
| <i>Amphisbaena cubana</i>           | ZMB 6904                 | Amphisbaenia:<br>Amphisbaenidae | Lacertoidea | 8.3               | 3   | Vitt & Caldwell [23]                             |
| <i>Leposternon malkini</i>          | MZUSP 13750              | Amphisbaenia:<br>Amphisbaenidae | Lacertoidea | 12.6              | 3   | Vitt & Caldwell [23]                             |
| <i>Cryptolacerta hassiaca</i>       | SMF ME 2604 <sup>3</sup> | Lacertibaenia                   | Lacertoidea | 12.4              | n/a | [extinct]                                        |
| <i>Psammodromus algirus</i>         | ZMB 17931                | Lacertidae                      | Lacertoidea | 8.8               | 1   | Martin & López [106]                             |
| <i>Gallotia stehlini</i>            | ZMB 29084                | Lacertidae                      | Lacertoidea | 12.5              | 1   | Carretero et al. [107]                           |
| <i>Atlantolacerta andreanskyi</i>   | ZFMK 8751                | Lacertidae                      | Lacertoidea | 6.1               | 1   | Hoser [108]                                      |
| <i>Nucras tessellata</i>            | ZMB 25635                | Lacertidae                      | Lacertoidea | 9.5               | 2   | Cooper & Whiting [109]                           |
| <i>Gastropholis echinata</i>        | ZMB 11333                | Lacertidae                      | Lacertoidea | 16.4              | 1   | Segniabeto et al. [110]                          |
| <i>Acanthodactylus boskianus</i>    | ZMB 70859                | Lacertidae                      | Lacertoidea | 8.9               | 2   | Zaady & Bouskila [111]                           |
| <i>Phoenicolacerta laevis</i>       | ZMB 14316                | Lacertidae                      | Lacertoidea | 10.4              | 1   | Modrý et al. [112]                               |
| <i>Lacerta schreiberi</i>           | ZMB 11024                | Lacertidae                      | Lacertoidea | 10.7              | 2   | Marco, Díaz-Paniagua, & Hidalgo-Vila [113]       |

|                                  |            |                 |             |      |   |                                                                  |
|----------------------------------|------------|-----------------|-------------|------|---|------------------------------------------------------------------|
| <i>Archaeolacerta bedriagae</i>  | ZMB 69157  | Lacertidae      | Lacertoidea | 10.5 | 1 | Bombi et al. [114]                                               |
| <i>Darevskia mixta</i>           | ZMB 44583  | Lacertidae      | Lacertoidea | 7.9  | 1 | Gabelaia, Adriaens, & Tarkhnishvili [115]                        |
| <i>Anniella pulchra</i>          | ZMB 7843   | Anniellidae     | Anguimorpha | 6.4  | 3 | Vitt & Caldwell [23]                                             |
| <i>Diploglossus fasciatus</i>    | ZMB 1183   | Anguidae        | Anguimorpha | 14.3 | 1 | Ribeiro & Amaral [116]                                           |
| <i>Ophiodes striatus</i>         | ZMB 67020  | Anguidae        | Anguimorpha | 14.5 | 2 | Oliveira [117]                                                   |
| <i>Celestus haetianus</i>        | ZMB 52518  | Anguidae        | Anguimorpha | 12.1 | 2 | Thomas [118]                                                     |
| <i>Dopasia gracilis</i>          | ZMB 9930   | Anguidae        | Anguimorpha | 12.0 | 2 | Verma [119]                                                      |
| <i>Ophisaurus koellikeri</i>     | ZMB 18006  | Anguidae        | Anguimorpha | 10.0 | 2 | de Pous et al. [120]                                             |
| <i>Anguis fragilis</i>           | ZMB 3239   | Anguidae        | Anguimorpha | 9.4  | 2 | Blain, Bailon, & Agustí [121]                                    |
| <i>Gerrhonotus liocephalus</i>   | ZMB 6691   | Anguidae        | Anguimorpha | 15.5 | 1 | Flury [122]                                                      |
| <i>Abronia spec.</i>             | ZMB 67130  | Anguidae        | Anguimorpha | 10.4 | 1 | Vitt & Caldwell [23]                                             |
| <i>Varanus griseus</i>           | ZMB 36602  | Varanidae       | Anguimorpha | 61.2 | 2 | Tsellarius & Tsellarius [123]                                    |
| <i>Varanus bengalensis</i>       | ZMB 16299  | Varanidae       | Anguimorpha | 34.8 | 2 | Traeholt [124]                                                   |
| <i>Furcifer minor</i>            | ZMB 10411  | Chamaeleonidae  | Iguania     | 13.0 | 1 | Randrianantoandro, Andriantsimanarilafy, & Randrianavelona [125] |
| <i>Tympanocryptis lineata</i>    | ZMB 4714   | Agamidae        | Iguania     | 10.9 | 1 | Melville & Schulte [28]                                          |
| <i>Phrynocephalus mystaceus</i>  | ZMB 44079  | Agamidae        | Iguania     | 17.5 | 2 | Panov, Tsellarius, & Nepomnyashchikh [126]                       |
| <i>Draco volans</i>              | ZMB 31390A | Agamidae        | Iguania     | 7.8  | 1 | Hairston [127]                                                   |
| <i>Uranoscodon superciliosus</i> | ZMB 30932  | Tropiduridae    | Iguania     | 18.5 | 1 | Howland, Vitt, & Lopez [128]                                     |
| <i>Leiocephalus carinatus</i>    | ZMB 78161  | Leiocephalidae  | Iguania     | 12.9 | 2 | Kavaliers, Courtenay, & Hirst [129]                              |
| <i>Phrynosoma orbiculare</i>     | ZMB 37142  | Phrynosomatidae | Iguania     | 14.0 | 2 | Weese [130]                                                      |
| <i>Corytophanes cristatus</i>    | ZMB 80461  | Corytophanidae  | Iguania     | 17.1 | 1 | Townsend et al. [131]                                            |
| <i>Anolis sagrei</i>             | ZMB 537    | Dactyloidae     | Iguania     | 9.1  | 2 | Pacala, Rummel, & Roughgarden [132]                              |
| <i>Liotyphlops albirostris</i>   | ZMB 9529   | Anomalepidae    | Serpentes   | 3.0  | 3 | Rieppel, Kley, & Maisano [133]                                   |
| <i>Afrottyphlops schlegelii</i>  | ZMB 36884  | Typhlopidae     | Serpentes   | 9.4  | 3 | Allemand et al. [134]                                            |
| <i>Anilius scytale</i>           | ZMB 1438   | Aniliidae       | Serpentes   | 12.5 | 3 | Allemand et al. [134]                                            |
| <i>Calabaria reinhardtii</i>     | ZMB 20308  | Boidae          | Serpentes   | 19.4 | 3 | Angelici et al. [135]                                            |
| <i>Candoia carinata</i>          | ZMB 14571  | Boidae          | Serpentes   | 11.7 | 1 | Jayne [136]                                                      |
| <i>Eryx conicus</i>              | ZMB 1463   | Boidae          | Serpentes   | 13.0 | 2 | Pough [137]                                                      |
| <i>Anomochilus leonardi</i>      | ZMB 80303  | Anomochilidae   | Serpentes   | 6.4  | 3 | Rieppel & Maisano [138]                                          |
| <i>Uropeltis ceylanicus</i>      | ZMB 90312  | Uropeltidae     | Serpentes   | 6.7  | 3 | Gower, Captain, & Thakur [139]                                   |

|                                     |              |                |           |      |   |                              |
|-------------------------------------|--------------|----------------|-----------|------|---|------------------------------|
| <i>Python bivittatus</i>            | ZMB 30906    | Pythonidae     | Serpentes | 40.7 | 1 | Sharma & Kandel [140]        |
| <i>Achalinus spinalis</i>           | ZMB 27948A   | Xenodermatidae | Serpentes | 10.7 | 3 | Yamasaki & Mori [141]        |
| <i>Cerastes vipera</i>              | ZMB 20862    | Viperidae      | Serpentes | 12.2 | 2 | Ibrahim [142]                |
| <i>Bothrops lanceolatus</i>         | ZMB 2946     | Viperidae      | Serpentes | 20.0 | 1 | Gros-Désormeaux et al. [143] |
| <i>Micrelaps vaillanti</i>          | ZMB 22406    | Lamprophiidae  | Serpentes | 5.0  | 3 | Rasmussen [144]              |
| <i>Psammophis crucifer</i>          | ZMB 16482    | Lamprophiidae  | Serpentes | 12.5 | 1 | Shine et al. [145]           |
| <i>Xenocalamus mechowii</i>         | ZMB 23387    | Lamprophiidae  | Serpentes | 8.7  | 3 | Bates [146]                  |
| <i>Lycodyras maculatus</i>          | ZMB 19226    | Lamprophiidae  | Serpentes | 14.1 | 1 | Vences et al. [147]          |
| <i>Dendroaspis angusticeps</i>      | ZMB 56385    | Elapidae       | Serpentes | 23.2 | 1 | Petras et al. [148]          |
| <i>Acanthophis antarcticus</i>      | ZMB 38580    | Elapidae       | Serpentes | 14.0 | 1 | Smith et al. [149]           |
| <i>Vermicella annulata</i>          | ZMB 63500    | Elapidae       | Serpentes | 11.0 | 3 | Johnson [150]                |
| <i>Geagras redimitus</i>            | MNHN RA 8404 | Colubridae     | Serpentes | 4.3  | 3 | Holm [151]                   |
| <i>Lycognathophis seychellensis</i> | ZMB 7617     | Colubridae     | Serpentes | 13.4 | 1 | Bowler [152]                 |
| <i>Heterodon platirhinos</i>        | ZMB 13871    | Colubridae     | Serpentes | 15.0 | 3 | Edgren [153]                 |

<sup>1</sup> in-plane resolution, voxel size = 21.5  $\mu\text{m}$  x 21.5  $\mu\text{m}$  x 47.2  $\mu\text{m}$ , resulting cross section resolution = 28.7  $\mu\text{m}$  - 33.0  $\mu\text{m}$

<sup>2</sup> scanned at the University of Texas High-Resolution X-ray CT Facility

<sup>3</sup> scanned at the Helmholtz Centre Berlin for Materials and Energy using a micro-focus X-ray

**Table S3. Key to collection numbers from Table S2.**

|              |                                                                                                                       |
|--------------|-----------------------------------------------------------------------------------------------------------------------|
| <b>AMNH</b>  | American Museum of Natural History, New York, NY, United States of America                                            |
| <b>CM</b>    | Carnegie Museum of Natural History, Pittsburgh, PA, United States of America                                          |
| <b>FMNH</b>  | Field Museum of Natural History, Chicago, IL, United States of America                                                |
| <b>MNHN</b>  | Muséum national d'Histoire naturelle, Paris, France                                                                   |
| <b>MZUSP</b> | Museum of Zoology of the University of São Paulo, São Paulo, Brazil                                                   |
| <b>SAMA</b>  | South Australian Museum, Adelaide, Australia                                                                          |
| <b>SMF</b>   | Senckenberg Naturmuseum Frankfurt, Leibniz Institution for Biodiversity and Earth System Research, Frankfurt, Germany |
| <b>UCMP</b>  | University of California Museum of Paleontology, Berkeley, CA, United States of America                               |
| <b>USNM</b>  | Smithsonian National Museum of Natural History, Washington, DC, United States of America                              |
| <b>ZFMK</b>  | Zoological Research Museum Alexander Koenig, Leibniz Institute for Animal Biodiversity, Bonn, Germany                 |
| <b>ZMB</b>   | Museum für Naturkunde, Leibniz Institute for Evolution and Biodiversity Science, Berlin, Germany                      |
| <b>ZMPU</b>  | Zoological Museum of Perm University, Perm, Russia                                                                    |
| <b>ZSM</b>   | Zoologische Staatssammlung München, Germany                                                                           |

**Table S4. Independent acquisitions of a fully fossorial lifestyle** for the here investigated taxa in accordance with stochastic mapping of character evolution (Figure 1). Regarding the higher clade averages, our dataset comprises 85 % of primary and 35 % of secondary acquisitions of a fully fossorial lifestyle. The resulting fully fossorial clusters were used as single converging tips in the convergence analysis.

| ACQUISITION NO. | CLUSTER / TAXA INCLUDED                                                                                                                                                                                                                                                                          | HIGHER LEVEL                      | SAMPLED / TOTAL                     |
|-----------------|--------------------------------------------------------------------------------------------------------------------------------------------------------------------------------------------------------------------------------------------------------------------------------------------------|-----------------------------------|-------------------------------------|
| 1               | <i>Dibamus novaeguineae</i>                                                                                                                                                                                                                                                                      | Dibamidae                         | 1 of 1 (100 %)                      |
| 2               | <i>Aprasia pulchella</i>                                                                                                                                                                                                                                                                         | Gekkota                           | 1 of 1 (100 %)                      |
| 3               | <i>Typhlosaurus aurantiacus</i>                                                                                                                                                                                                                                                                  |                                   |                                     |
| 4               | <i>Plestiodon reynoldsi</i>                                                                                                                                                                                                                                                                      |                                   |                                     |
| 5               | <i>Scincus scincus</i>                                                                                                                                                                                                                                                                           | Scincoidea                        | 5 of 20 (25 %)                      |
| 6               | <i>Grandidierina petiti</i>                                                                                                                                                                                                                                                                      |                                   |                                     |
| 7               | common ancestor of<br><i>Saiphos equalis</i> and<br><i>Coeranoscincus reticulatus</i>                                                                                                                                                                                                            |                                   |                                     |
| 8               | <i>Bachia panoplia</i>                                                                                                                                                                                                                                                                           | non-lacertibaenian<br>Lacertoidea | 2 of 3 (67 %)                       |
| 9               | <i>Calyptommatus sinebrachiatus</i>                                                                                                                                                                                                                                                              |                                   |                                     |
| 10              | Amphisbaenia:<br><i>Rhineura floridana</i> ,<br><i>Bipes tridactylus</i> ,<br><i>Blanus cinereus</i> ,<br><i>Cadea blanoidea</i> ,<br><i>Trogonophis wiegmanni</i> ,<br><i>Geocalamus acutus</i> ,<br><i>Amphisbaena alba</i> ,<br><i>Amphisbaena cubana</i> ,<br>and <i>Leposternon malkini</i> | Lacertibaenia                     | 1 of 1 (100 %)                      |
| 11              | <i>Anniella pulchra</i>                                                                                                                                                                                                                                                                          | Anguimorpha                       | 1 of 1 (100 %)                      |
| 12              | common ancestor of<br><i>Liotyphlops albirostris</i> and<br><i>Afrotyphlops schlegelii</i>                                                                                                                                                                                                       |                                   |                                     |
| 13              | <i>Anilius scytale</i>                                                                                                                                                                                                                                                                           |                                   |                                     |
| 14              | <i>Calabaria reinhardtii</i>                                                                                                                                                                                                                                                                     |                                   |                                     |
| 15              | common ancestor of<br><i>Anomochilus leonardi</i> and<br><i>Uropeltis ceylanicus</i>                                                                                                                                                                                                             | Serpentes                         | <u>primary:</u><br>1 of 1 (100 %)   |
| 16              | <i>Achalinus spinalis</i>                                                                                                                                                                                                                                                                        |                                   | <u>secondary:</u><br>9 of 26 (35 %) |
| 17              | <i>Micrelaps vaillanti</i>                                                                                                                                                                                                                                                                       |                                   |                                     |
| 18              | <i>Xenocalamus mechowii</i>                                                                                                                                                                                                                                                                      |                                   |                                     |
| 19              | <i>Vermicella annulata</i>                                                                                                                                                                                                                                                                       |                                   |                                     |
| 20              | <i>Geagrass redimitus</i>                                                                                                                                                                                                                                                                        |                                   |                                     |
| 21              | <i>Heterodon platirhinus</i>                                                                                                                                                                                                                                                                     |                                   |                                     |

**Table S5. Per specimen measurements:** skull roof compactness (*c*), thickness (*d*), bone overlap (*ovl*), ratio of frontal and parietal (*rfp*), cranial elongation (*elo*), skull diameter (*dia*), and lifestyle (1 = non-fossorial, 2 = semi-fossorial, 3 = fully fossorial)

| species                            | lifestyle | <i>c</i> [%] | <i>d</i> [%] | <i>ovl</i> [%] | <i>rfp</i> [-] | <i>elo</i> [-] | <i>dia</i> [mm] |
|------------------------------------|-----------|--------------|--------------|----------------|----------------|----------------|-----------------|
| <i>Sphenodon punctatus</i>         | 2         | 87.6         | 1.79         | 28.6           | 1.03           | 1.38           | 41.17           |
| <i>Dibamus novaeguineae</i>        | 3         | 99.1         | 1.61         | 34.9           | 0.72           | 2.41           | 3.05            |
| <i>Lialis burtonis</i>             | 2         | 98.1         | 1.34         | 32.7           | 0.69           | 3.33           | 8.09            |
| <i>Aprasia pulchella</i>           | 3         | 99.0         | 1.68         | 16.7           | 0.75           | 2.16           | 2.96            |
| <i>Sphaerodactylus bromeliarum</i> | 1         | 98.3         | 0.79         | 33.3           | 1.10           | 2.06           | 3.29            |
| <i>Tarentola mauritanica</i>       | 1         | 86.7         | 1.68         | 26.7           | 1.31           | 1.85           | 10.53           |
| <i>Gekko gekko</i>                 | 1         | 75.1         | 1.67         | 21.6           | 1.27           | 1.60           | 20.98           |
| <i>Xantusia riversiana</i>         | 1         | 94.5         | 1.57         | 20.7           | 0.76           | 1.90           | 8.80            |
| <i>Tetradactylus africanus</i>     | 1         | 94.7         | 1.42         | 22.5           | 1.02           | 2.32           | 6.13            |
| <i>Platysaurus capensis</i>        | 1         | 98.1         | 1.15         | 25.9           | 0.97           | 2.07           | 8.38            |
| <i>Cordylus cataphractus</i>       | 1         | 81.0         | 1.74         | 20.1           | 0.86           | 1.51           | 15.06           |
| <i>Chamaesaura anguina</i>         | 1         | 92.0         | 1.62         | 26.0           | 0.98           | 2.47           | 6.48            |
| <i>Typhlosaurus aurantiacus</i>    | 3         | 99.2         | 1.30         | 27.1           | 0.58           | 2.19           | 3.86            |
| <i>Plestiodon latiscutatus</i>     | 2         | 93.6         | 1.23         | 16.5           | 1.03           | 1.59           | 10.35           |
| <i>Plestiodon reynoldsi</i>        | 3         | 99.8         | 1.05         | 22.1           | 0.90           | 2.18           | 3.28            |
| <i>Scincus scincus</i>             | 3         | 95.4         | 1.49         | 29.1           | 1.15           | 1.98           | 12.37           |
| <i>Grandidierina petiti</i>        | 3         | 99.7         | 1.09         | 25.0           | 0.51           | 2.45           | 2.46            |
| <i>Sphenomorphus solomonis</i>     | 1         | 99.7         | 1.21         | 15.4           | 0.87           | 1.90           | 6.38            |
| <i>Saiphos equalis</i>             | 3         | 98.7         | 1.32         | 28.9           | 0.80           | 2.25           | 4.67            |
| <i>Coeranoscincus reticulatus</i>  | 3         | 99.9         | 1.56         | 29.8           | 0.76           | 2.32           | 7.81            |
| <i>Eulamprus quoyii</i>            | 1         | 75.6         | 2.03         | 22.2           | 1.06           | 3.08           | 7.49            |
| <i>Lerista timida</i>              | 2         | 98.7         | 1.37         | 38.5           | 0.86           | 2.41           | 2.61            |
| <i>Egernia kingii</i>              | 2         | 94.0         | 1.75         | 27.9           | 0.87           | 1.78           | 13.57           |
| <i>Tiliqua scincoides</i>          | 1         | 80.6         | 1.38         | 24.3           | 1.03           | 1.97           | 16.30           |
| <i>Liopholis whitii</i>            | 2         | 91.3         | 1.66         | 17.8           | 1.02           | 1.95           | 10.61           |
| <i>Eutropis multifasciata</i>      | 2         | 90.8         | 1.21         | 21.2           | 1.17           | 1.95           | 10.17           |
| <i>Trachylepis quinquetaeniata</i> | 1         | 88.2         | 1.39         | 24.2           | 1.21           | 1.69           | 12.17           |
| <i>Kentropyx altamazonica</i>      | 1         | 73.6         | 1.43         | 28.4           | 1.35           | 2.01           | 11.14           |
| <i>Alopoglossus copii</i>          | 2         | 92.7         | 0.99         | 33.8           | 1.24           | 1.91           | 8.72            |
| <i>Bachia flavescens</i>           | 2         | 100.0        | 1.20         | 35.4           | 1.12           | 2.46           | 3.39            |
| <i>Bachia panoplia</i>             | 3         | 100.0        | 1.44         | 34.6           | 0.86           | 2.00           | 5.47            |

|                                     |     |      |      |      |      |      |       |
|-------------------------------------|-----|------|------|------|------|------|-------|
| <i>Calyptommatus sinebrachiatus</i> | 3   | 99.9 | 0.88 | 42.6 | 0.69 | 2.01 | 2.88  |
| <i>Gymnophthalmus lineatus</i>      | 2   | 99.9 | 0.91 | 36.9 | 0.97 | 2.15 | 3.02  |
| <i>Spathorhynchus fossorium</i>     | n/a | 97.9 | 2.15 | 45.5 | 0.82 | 1.94 | 17.85 |
| <i>Dyticonastis rensbergeri</i>     | n/a | 97.8 | 2.28 | 39.0 | 0.82 | 2.26 | 10.41 |
| <i>Hyporhina antiqua</i>            | n/a | 99.7 | 2.58 | 37.2 | 0.72 | 2.02 | 5.08  |
| <i>Rhineura floridana</i>           | 3   | 99.1 | 1.92 | 32.3 | 0.81 | 2.21 | 4.26  |
| <i>Rhineura hatcheri</i>            | n/a | 96.1 | 2.24 | 42.1 | 0.88 | 2.37 | 6.30  |
| <i>Bipes tridactylus</i>            | 3   | 95.8 | 2.22 | 41.8 | 0.72 | 1.79 | 4.37  |
| <i>Blanus cinereus</i>              | 3   | 99.6 | 1.84 | 39.4 | 0.47 | 2.16 | 3.10  |
| <i>Cadea blanoides</i>              | 3   | 99.8 | 2.15 | 46.5 | 0.49 | 2.29 | 5.77  |
| <i>Trogonophis wiegmanni</i>        | 3   | 99.9 | 2.31 | 45.5 | 0.35 | 2.15 | 5.10  |
| <i>Geocalamus acutus</i>            | 3   | 99.7 | 1.84 | 43.8 | 0.71 | 2.29 | 3.31  |
| <i>Amphisbaena alba</i>             | 3   | 97.8 | 2.72 | 41.9 | 0.54 | 2.40 | 9.23  |
| <i>Amphisbaena cubana</i>           | 3   | 99.8 | 2.14 | 46.9 | 0.50 | 2.66 | 3.44  |
| <i>Leposternon malkini</i>          | 3   | 98.9 | 2.76 | 46.8 | 0.69 | 1.85 | 8.64  |
| <i>Cryptolacerta hassiaca</i>       | n/a | 97.4 | 1.51 | 18.8 | 0.82 | 2.03 | 8.96  |
| <i>Psammodromus algirus</i>         | 1   | 88.3 | 1.42 | 30.0 | 1.09 | 1.79 | 9.94  |
| <i>Gallotia stehlini</i>            | 1   | 87.5 | 1.74 | 23.2 | 1.14 | 1.70 | 18.19 |
| <i>Atlantolacerta andreanskyi</i>   | 1   | 89.6 | 1.16 | 28.8 | 0.98 | 1.91 | 5.93  |
| <i>Nucras tessellata</i>            | 2   | 89.6 | 1.86 | 31.5 | 0.97 | 1.86 | 9.47  |
| <i>Gastropholis echinata</i>        | 1   | 95.8 | 1.96 | 27.4 | 0.95 | 2.12 | 10.51 |
| <i>Acanthodactylus boskianus</i>    | 2   | 90.5 | 1.13 | 29.2 | 1.27 | 1.86 | 9.12  |
| <i>Phoenicolacerta laevis</i>       | 1   | 93.3 | 1.20 | 28.0 | 1.14 | 2.06 | 7.78  |
| <i>Lacerta schreiberi</i>           | 2   | 88.4 | 1.30 | 20.7 | 1.05 | 1.89 | 11.06 |
| <i>Archaeolacerta bedriagae</i>     | 1   | 93.9 | 1.59 | 26.9 | 1.15 | 1.95 | 8.35  |
| <i>Darevskia mixta</i>              | 1   | 88.5 | 1.03 | 26.9 | 1.05 | 2.35 | 5.25  |
| <i>Anniella pulchra</i>             | 3   | 99.3 | 1.42 | 37.1 | 0.63 | 2.48 | 3.70  |
| <i>Diploglossus fasciatus</i>       | 1   | 86.9 | 1.25 | 28.5 | 0.89 | 1.81 | 12.36 |
| <i>Ophiodes striatus</i>            | 2   | 91.5 | 1.65 | 21.2 | 0.93 | 2.30 | 8.99  |
| <i>Celestus haetianus</i>           | 2   | 95.3 | 2.35 | 27.2 | 0.75 | 1.97 | 7.95  |
| <i>Dopasia gracilis</i>             | 2   | 99.4 | 1.39 | 22.3 | 0.85 | 1.85 | 8.06  |
| <i>Ophisaurus koellikeri</i>        | 2   | 99.4 | 1.40 | 23.7 | 0.86 | 2.04 | 6.65  |
| <i>Anguis fragilis</i>              | 2   | 98.2 | 1.47 | 22.9 | 0.79 | 2.16 | 7.01  |
| <i>Gerrhonotus liocephalus</i>      | 1   | 86.8 | 1.78 | 29.5 | 0.88 | 1.60 | 17.26 |

|                                     |   |       |      |      |      |      |       |
|-------------------------------------|---|-------|------|------|------|------|-------|
| <i>Abronia spec.</i>                | 1 | 97.4  | 1.67 | 35.0 | 0.95 | 2.02 | 7.52  |
| <i>Varanus griseus</i>              | 2 | 80.2  | 1.30 | 30.7 | 1.19 | 1.92 | 29.33 |
| <i>Varanus bengalensis</i>          | 2 | 97.8  | 1.26 | 25.8 | 0.94 | 2.21 | 22.32 |
| <i>Furcifer minor</i>               | 1 | 70.6  | 1.00 | 24.3 | 1.70 | 1.47 | 12.33 |
| <i>Tympanocryptis lineata</i>       | 1 | 86.3  | 1.23 | 29.1 | 1.18 | 1.31 | 10.33 |
| <i>Phrynocephalus mystaceus</i>     | 2 | 79.5  | 1.67 | 22.2 | 0.92 | 1.08 | 19.00 |
| <i>Draco volans</i>                 | 1 | 75.8  | 1.25 | 22.1 | 1.10 | 1.58 | 8.41  |
| <i>Uranoscodon superciliosus</i>    | 1 | 78.8  | 1.59 | 19.8 | 0.98 | 1.41 | 19.42 |
| <i>Leiocephalus carinatus</i>       | 2 | 81.2  | 1.11 | 21.2 | 1.06 | 1.49 | 12.53 |
| <i>Phrynosoma orbiculare</i>        | 2 | 55.8  | 1.19 | 12.2 | 0.98 | 0.91 | 20.02 |
| <i>Corytophanes cristatus</i>       | 1 | 64.9  | 1.33 | 31.6 | 1.05 | 1.44 | 18.46 |
| <i>Anolis sagrei</i>                | 2 | 77.5  | 1.85 | 27.3 | 1.22 | 1.89 | 8.08  |
| <i>Liotyphlops albirostris</i>      | 3 | 99.1  | 1.68 | 7.6  | 0.45 | 2.64 | 1.66  |
| <i>Afrotyphlops schlegelii</i>      | 3 | 97.4  | 2.65 | 24.8 | 1.53 | 2.12 | 4.98  |
| <i>Anilius scytale</i>              | 3 | 100.0 | 1.83 | 28.4 | 0.34 | 2.49 | 6.83  |
| <i>Calabaria reinhardtii</i>        | 3 | 98.6  | 2.55 | 7.3  | 0.67 | 2.00 | 10.22 |
| <i>Candoia carinata</i>             | 1 | 99.0  | 1.61 | 5.3  | 0.55 | 2.64 | 7.94  |
| <i>Eryx conicus</i>                 | 2 | 99.4  | 1.78 | 19.4 | 0.54 | 2.24 | 8.05  |
| <i>Anomochilus leonardi</i>         | 3 | 100.0 | 2.38 | 32.4 | 0.38 | 2.27 | 3.98  |
| <i>Uropeltis ceylanicus</i>         | 3 | 98.9  | 1.61 | 29.7 | 0.52 | 2.85 | 4.18  |
| <i>Python bivittatus</i>            | 1 | 99.6  | 1.50 | 14.9 | 0.54 | 2.16 | 34.63 |
| <i>Achalinus spinalis</i>           | 3 | 100.0 | 1.41 | 13.0 | 0.38 | 2.49 | 6.67  |
| <i>Cerastes vipera</i>              | 2 | 95.3  | 1.37 | 5.4  | 0.65 | 1.93 | 10.14 |
| <i>Bothrops lanceolatus</i>         | 1 | 94.6  | 0.93 | 3.2  | 0.56 | 1.92 | 9.03  |
| <i>Micrelaps vaillanti</i>          | 3 | 98.9  | 2.07 | 9.6  | 0.33 | 3.22 | 2.43  |
| <i>Psammophis crucifer</i>          | 1 | 97.6  | 1.15 | -0.3 | 0.78 | 2.61 | 7.91  |
| <i>Xenocalamus mechowii</i>         | 3 | 98.5  | 4.93 | 34.7 | 0.65 | 2.89 | 4.45  |
| <i>Lycodryas maculatus</i>          | 1 | 99.6  | 1.39 | -1.5 | 0.60 | 2.38 | 7.21  |
| <i>Dendroaspis angusticeps</i>      | 1 | 99.9  | 1.45 | -5.6 | 0.68 | 2.61 | 15.64 |
| <i>Acanthophis antarcticus</i>      | 1 | 94.3  | 1.11 | 6.4  | 0.57 | 1.67 | 13.52 |
| <i>Vermicella annulata</i>          | 3 | 97.7  | 1.88 | 13.8 | 0.56 | 2.64 | 5.74  |
| <i>Geagrass redimitus</i>           | 3 | 94.2  | 1.92 | 20.9 | 0.68 | 2.26 | 3.48  |
| <i>Lycognathophis seychellensis</i> | 1 | 95.9  | 1.61 | 6.6  | 0.70 | 2.71 | 10.16 |
| <i>Heterodon platirhinos</i>        | 3 | 98.5  | 1.89 | 15.2 | 0.94 | 2.40 | 12.46 |



**Table S6. Key to species name abbreviations used in Figure 4 and S2.** Two-letter codes represent fully fossorial tips, three-letter codes represent non- and semi-fossorial tips. Species in italic letters, other groups (in accordance with Table S4) in roman letters.

|                                                 |                                              |                                                                                                 |
|-------------------------------------------------|----------------------------------------------|-------------------------------------------------------------------------------------------------|
| <i>Abs</i> = <i>Abronia spec.</i>               | <i>Dea</i> = <i>Dendroaspis angusticeps</i>  | <i>Psc</i> = <i>Psammophis crucifer</i>                                                         |
| <i>Aca</i> = <i>Acanthophis antarcticus</i>     | <i>Euq</i> = <i>Eulamprus quoyii</i>         | <i>Pyb</i> = <i>Python bivittatus</i>                                                           |
| <i>Am</i> = <i>Amphisbaenia</i>                 | <i>Fum</i> = <i>Furcifer minor</i>           | <i>Sc</i> = common ancestor<br>of <i>Saiphos equalis</i><br>& <i>Coeranoscincus reticulatus</i> |
| <i>Asc</i> = <i>Anilius scytale</i>             | <i>Gas</i> = <i>Gallotia stehlini</i>        |                                                                                                 |
| <i>Asp</i> = <i>Achalinus spinalis</i>          | <i>Geg</i> = <i>Gekko gekko</i>              | <i>Spp</i> = <i>Sphenodon punctatus</i>                                                         |
| <i>Baf</i> = <i>Bachia flavescens</i>           | <i>Gel</i> = <i>Gerrhonotus liocephalus</i>  | <i>Ss</i> = <i>Scincus scincus</i>                                                              |
| <i>Bol</i> = <i>Bothrops lanceolatus</i>        | <i>Gr</i> = <i>Geagras redimitus</i>         | <i>Tam</i> = <i>Tarentola mauritanica</i>                                                       |
| <i>Bp</i> = <i>Bachia panoplia</i>              | <i>Hp</i> = <i>Heterodon platirhinos</i>     | <i>Tyl</i> = <i>Tympanocryptis lineata</i>                                                      |
| <i>bS</i> = basal Serpentes                     | <i>Kea</i> = <i>Kentropyx altamazonica</i>   | <i>Urs</i> = <i>Uranoscodon superciliosus</i>                                                   |
| <i>Cca</i> = <i>Cordylus cataphractus</i>       | <i>Lib</i> = <i>Lialis burtonis</i>          | <i>Vab</i> = <i>Varanus bengalensis</i>                                                         |
| <i>Ccr</i> = <i>Corytophanes cristatus</i>      | <i>Lym</i> = <i>Lycodryas maculatus</i>      | <i>Vag</i> = <i>Varanus griseus</i>                                                             |
| <i>Ceh</i> = <i>Celestus haetianus</i>          | <i>Mv</i> = <i>Micrelaps vaillanti</i>       | <i>Vp</i> = <i>Grandidierina petiti</i>                                                         |
| <i>Cr</i> = <i>Calabaria reinhardtii</i>        | <i>Phm</i> = <i>Phrynocephalus mystaceus</i> | <i>Xm</i> = <i>Xenocalamus mechowii</i>                                                         |
| <i>Cs</i> = <i>Calyptommatus sinebrachiatus</i> | <i>Pho</i> = <i>Phrynosoma orbiculare</i>    |                                                                                                 |
| <i>Dam</i> = <i>Darevskia mixta</i>             | <i>Pr</i> = <i>Plestiodon reynoldsi</i>      |                                                                                                 |
